# Supplementary material
Source: PubMed Central journal article supplement (PMC8100573)

Supplemental Figure for:  
The effect of concomitant proton pump inhibitor and cabozantinib on the outcomes of patients with metastatic renal cell carcinoma.  
Laurence Albiges et al.

Figure 1S: Box-and-whiskers plot for Ctrough among PPI users and non-users.

Figure1S text : Ctrough of Cabozantinib for PPI non users was 531,84 ng/ml (IQR 359,5-806,9 ng/ml), while median Cmin for PPI users was 459,1 ng/ml (IQR 357,2-641.1ng/ml), not statistically significant (p 0.34)

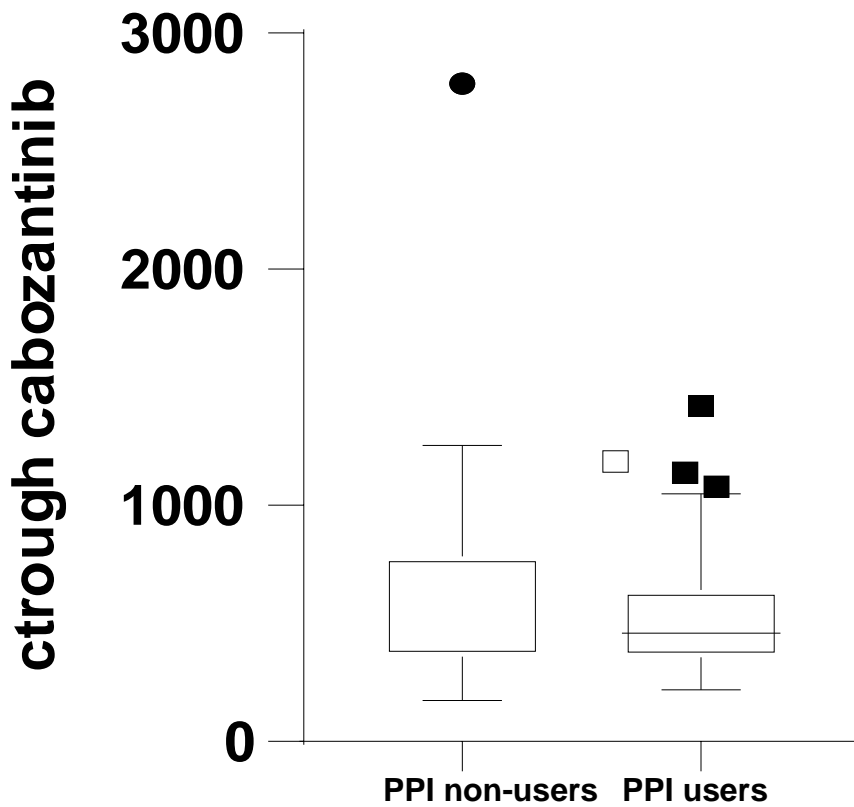

Supplement: ONCO-26-389-s001.pdf [file ONCO-26-389-s001.pdf]
